# Supplementary material
Source: publisher figshare collection journal article supplement (https://adisjournals.figshare.com/ndownloader/files/37925409)
Supplement: Supplementary file 1 [file 37925409]

# Economic burden of comorbidities in patients with psoriasis in the United States

Jashin Wu, Manasi Suryavanshi, David Davidson, Vardhaman Patel, Anuj Jain, Lauren Seigel

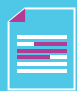

## Summary:

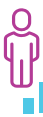

**Patients** with **PsO** experience a **higher economic burden** than the general population due to comorbidities

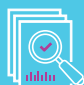

## Study Design:

Retrospective cohort study • HCRU and costs • IBM® MarketScan® (now Merative™) Commercial and Medicare Databases

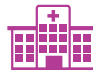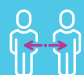

## Comparison:

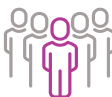

**Patients** with moderate to severe **PsO vs general population**

## Outcomes: Additional cost of comorbidities (compared with the general population)\*

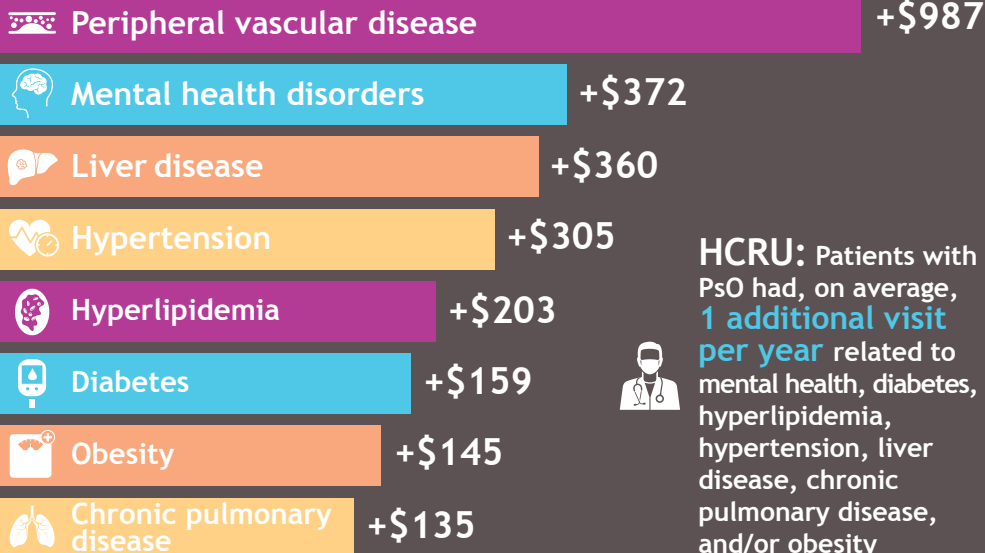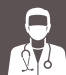

\*Per patient per month 2020 USD (all  $P < 0.01$ ).  
HCRU, healthcare resource utilization; PsO, psoriasis.

The graphical abstract represents the opinions of the authors. For a full list of declarations, including funding and author disclosure statements, and copyright information, please see the full text online.
